# Supplementary material
Source: MDPI journal article supplement (https://www.mdpi.com/2073-4344/13/1/171)
Supplement: s1 [file s1 › catalysts-2127951-supplementary.pdf]

## Catalytic Hydrodeoxygenation of Vanillin, a Bio-oil Model Compound over Renewable Ni/Biochar Catalyst

Ismaila Mudi<sup>1</sup>, Andy Ingram<sup>1</sup>, Abarasi Hart<sup>2</sup> and Joe Wood<sup>1\*</sup>

<sup>1</sup>*School of Chemical Engineering, University of Birmingham, Edgbaston, Birmingham, B15 2TT, UK*

<sup>2</sup>*Department of Chemical and Biological Engineering, the University of Sheffield, Sheffield, S1 3JD, UK*

*\*Corresponding author: J. wood.bham.ac.uk*

**Table S1** shows the Design of Experiment (DOE) matrix, vanillin conversion and corresponding p-cresol yields. **Figure S1** shows the SEM-EDX of the biochar and the compositional element mapping.

**Table S1:** DOE matrix and results obtained from Hydrodeoxygenation of Vanillin to p-cresol

| Exp. no. | Temperature (°C) | Pressure (bar) | Catalyst (g) | VL Conv. (%) | P-cresol yield (%) |
|----------|------------------|----------------|--------------|--------------|--------------------|
| 1        | 100              | 30             | 0.6          | 11.80        | 5.11               |
| 2        | 150              | 30             | 0.6          | 71.80        | 62.61              |
| 3        | 100              | 50             | 0.6          | 26.30        | 12.48              |
| 4        | 150              | 50             | 0.6          | 97.00        | 91.17              |
| 5        | 100              | 40             | 0.4          | 20.60        | 13.28              |
| 6        | 150              | 40             | 0.4          | 87.70        | 83.15              |
| 7        | 100              | 40             | 0.8          | 23.70        | 15.30              |
| 8        | 150              | 40             | 0.8          | 95.10        | 87.30              |
| 9        | 125              | 30             | 0.4          | 25.50        | 18.23              |
| 10       | 125              | 50             | 0.8          | 48.20        | 33.78              |
| 11       | 125              | 30             | 0.8          | 35.50        | 22.29              |
| 12       | 125              | 50             | 0.8          | 52.66        | 44.46              |
| 13       | 125              | 40             | 0.6          | 41.40        | 32.70              |
| 14       | 125              | 40             | 0.6          | 40.19        | 34.44              |
| 15       | 125              | 40             | 0.6          | 44.80        | 35.15              |

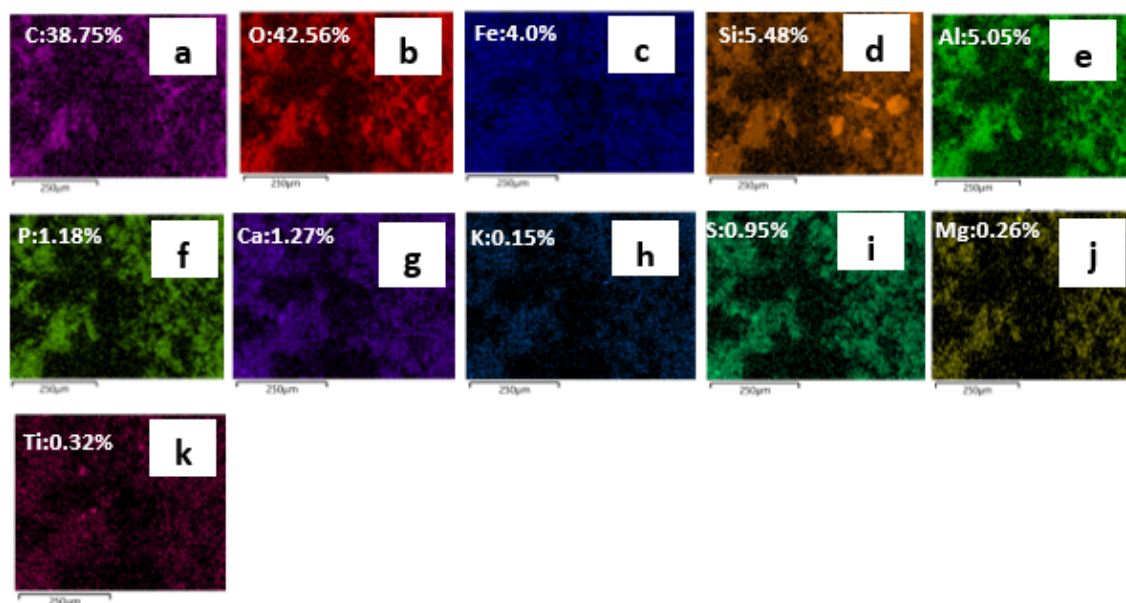

**Figure S1.** SEM-EDX analysis of biochar
